# Supplementary material for: Immune activity score to assess the prognosis, immunotherapy and chemotherapy response in gastric cancer and experimental validation
Source: PeerJ journal article supplement (doi:10.7717/peerj.16317), 2023-11-14
Supplement: Supplementary_Figure_1.pdf [file Supplementary_Figure_1.pdf]

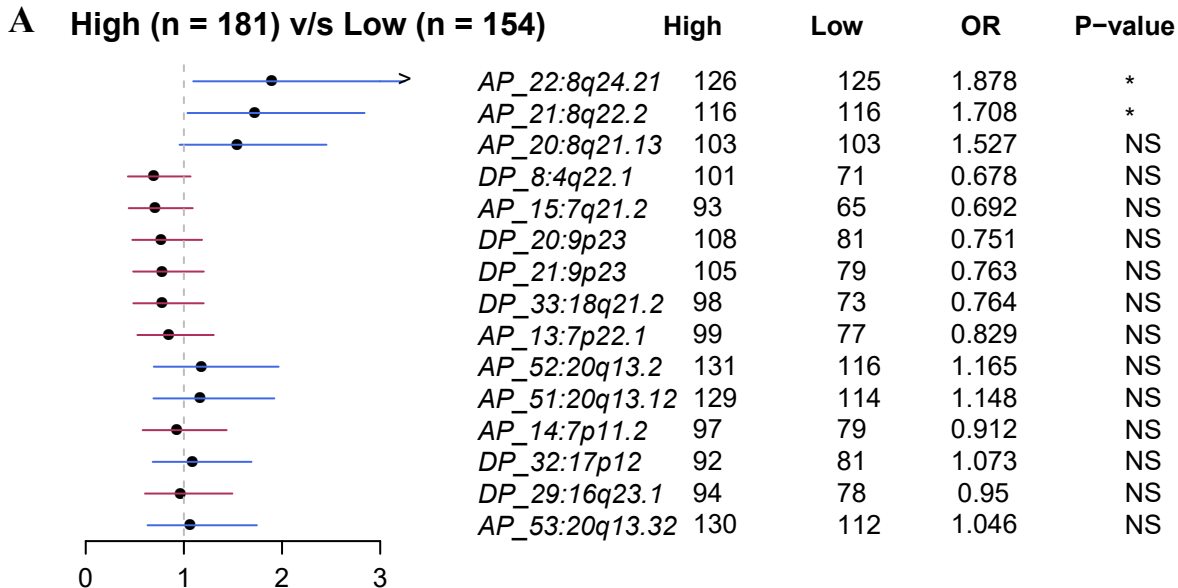

Odds ratio with 95% CI  
(1 = no effect, < 1 High has more mutants)

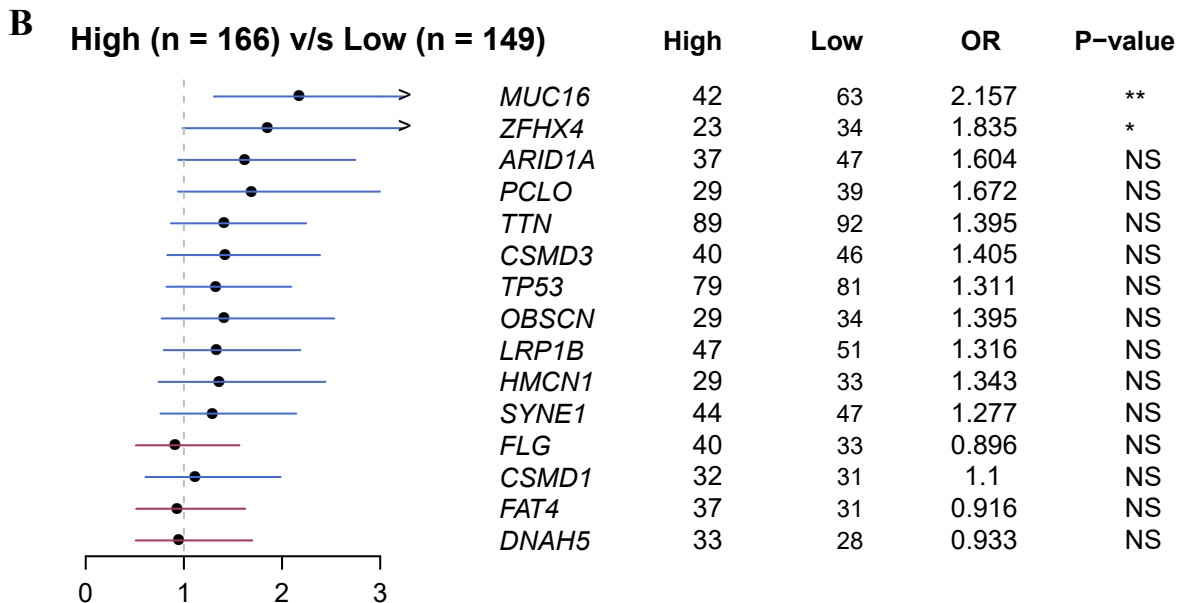

Odds ratio with 95% CI  
(1 = no effect, < 1 High has more mutants)
