# Supplementary material for: Immune activity score to assess the prognosis, immunotherapy and chemotherapy response in gastric cancer and experimental validation
Source: PeerJ journal article supplement (doi:10.7717/peerj.16317), 2023-11-14

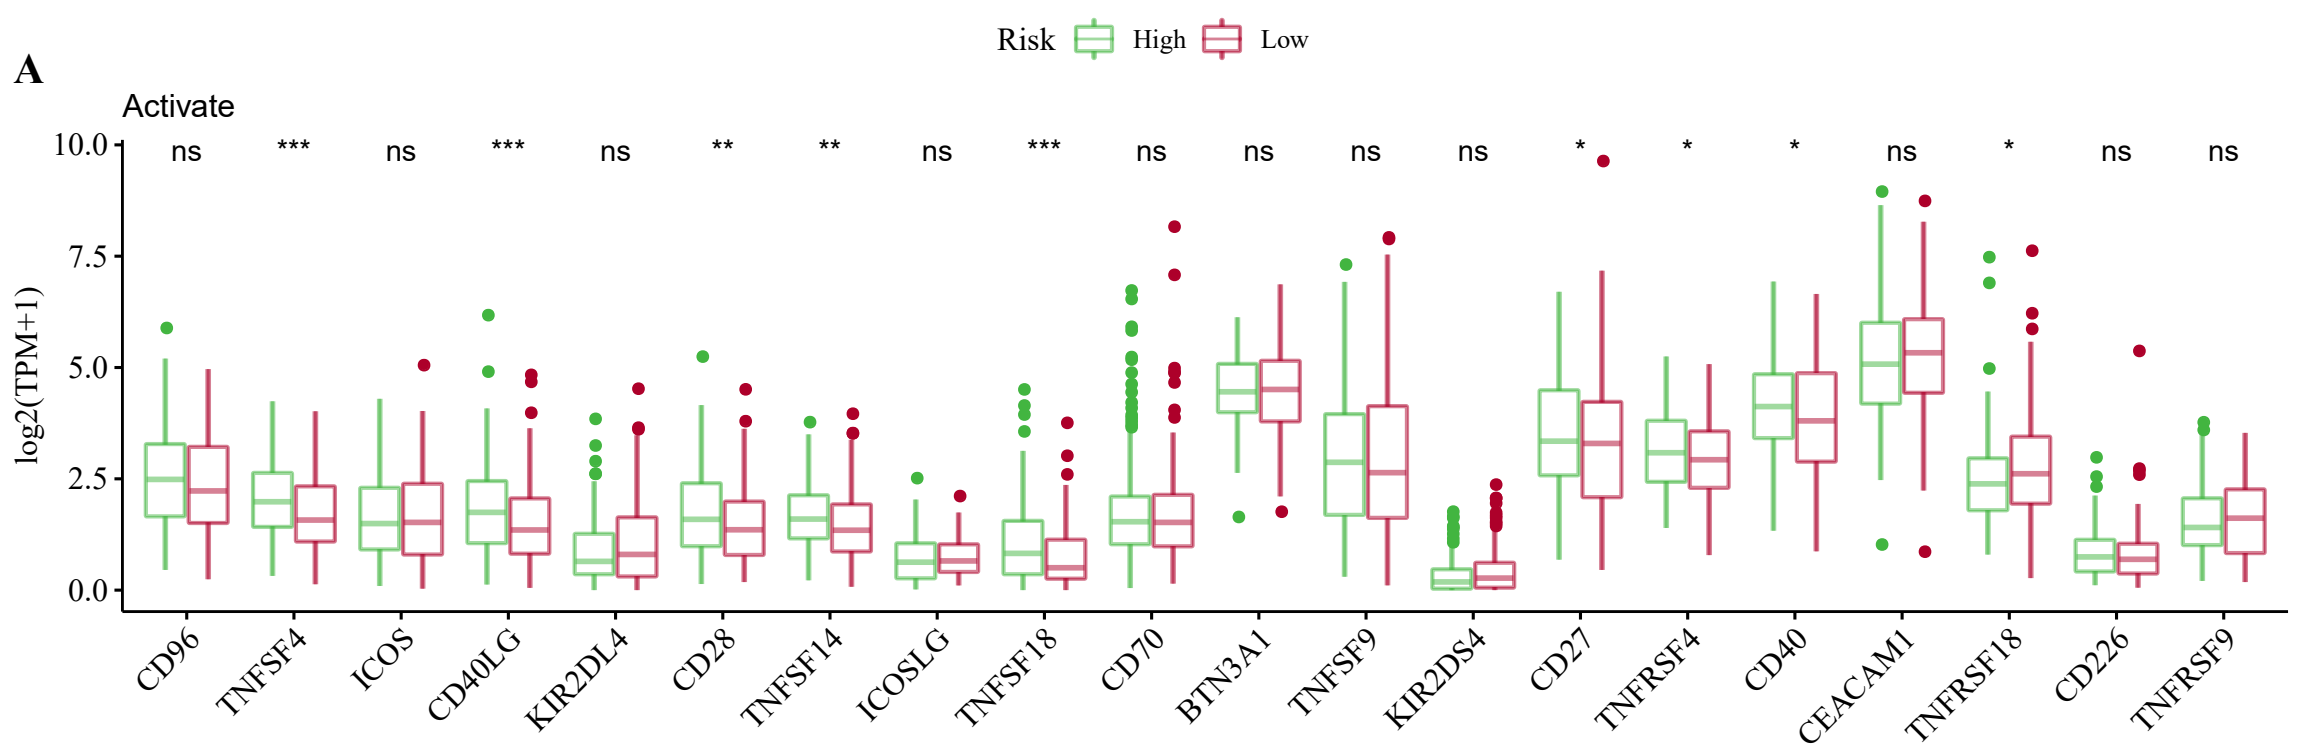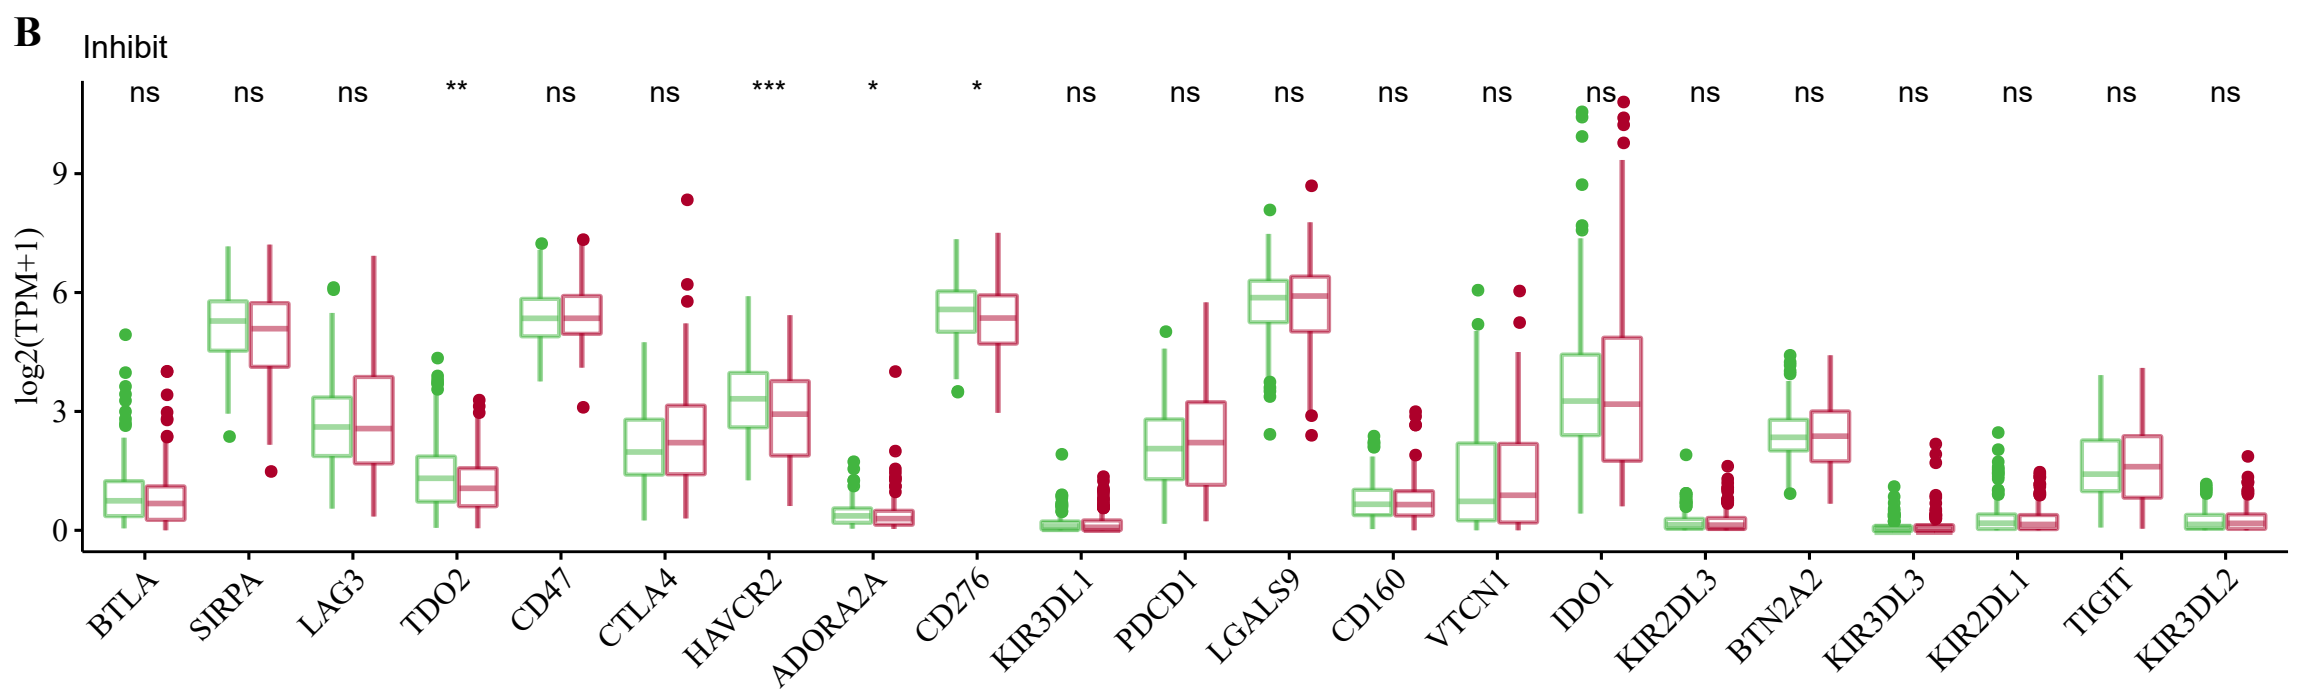

Supplement: Supplementary_Figure_3.pdf [file Supplementary_Figure_3.pdf]
